# Supplementary material for: Spleen data: Cerium oxide nanoparticles attenuate polymicrobial sepsis induced spenic damage in male Sprague Dawley rats
Source: PubMed Central journal article supplement — Data Brief. 2018 Mar 22;18:740–6. doi: 10.1016/j.dib.2018.03.073 (PMC5996310; doi:10.1016/j.dib.2018.03.073), 2018-03-22
Supplement: mmc1.pdf [file mmc1.pdf]

## AUTHOR DECLARATION

We wish to confirm that there are no known conflicts of interest associated with this publication and there has been no significant financial support for this work that could have influenced its outcome.

We confirm that the manuscript has been read and approved by all named authors and that there are no other persons who satisfied the criteria for authorship but are not listed. We further confirm that the order of authors listed in the manuscript has been approved by all of us.

We confirm that we have given due consideration to the protection of intellectual property associated with this work and that there are no impediments to publication, including the timing of publication, with respect to intellectual property. In so doing we confirm that we have followed the regulations of our institutions concerning intellectual property.

We further confirm that any aspect of the work covered in this manuscript that has involved either experimental animals or human patients has been conducted with the ethical approval of all relevant bodies and that such approvals are acknowledged within the manuscript.

We understand that the Corresponding Author is the sole contact for the Editorial process (including Editorial Manager and direct communications with the office). He/she is responsible for communicating with the other authors about progress, submissions of revisions and final approval of proofs. We confirm that we have provided a current, correct email address which is accessible by the Corresponding Author and which has been configured to accept email from [rice9@marshall.edu](mailto:rice9@marshall.edu).

Signed by all authors as follows: [LIST AUTHORS AND DATED SIGNATURES ALONGSIDE]

Kevin M. Rice



---

3-1-18

Venkata V K Bandrupalli



---

3-1-18

Nandini D.P.K. Manne



---

3/1/18

Eric R. Blough

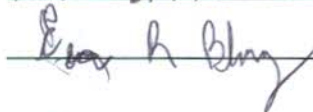

---

3-1-18
